# Supplementary material for: Effect of Gold Nanoparticles and Silicon on the Bioactivity and Antibacterial Properties of Hydroxyapatite/Chitosan/Tricalcium Phosphate-Based Biomicroconcretes
Source: MDPI journal article supplement (doi:10.3390/ma14143854), 2021-07-09
Supplement: s1 [file s1]

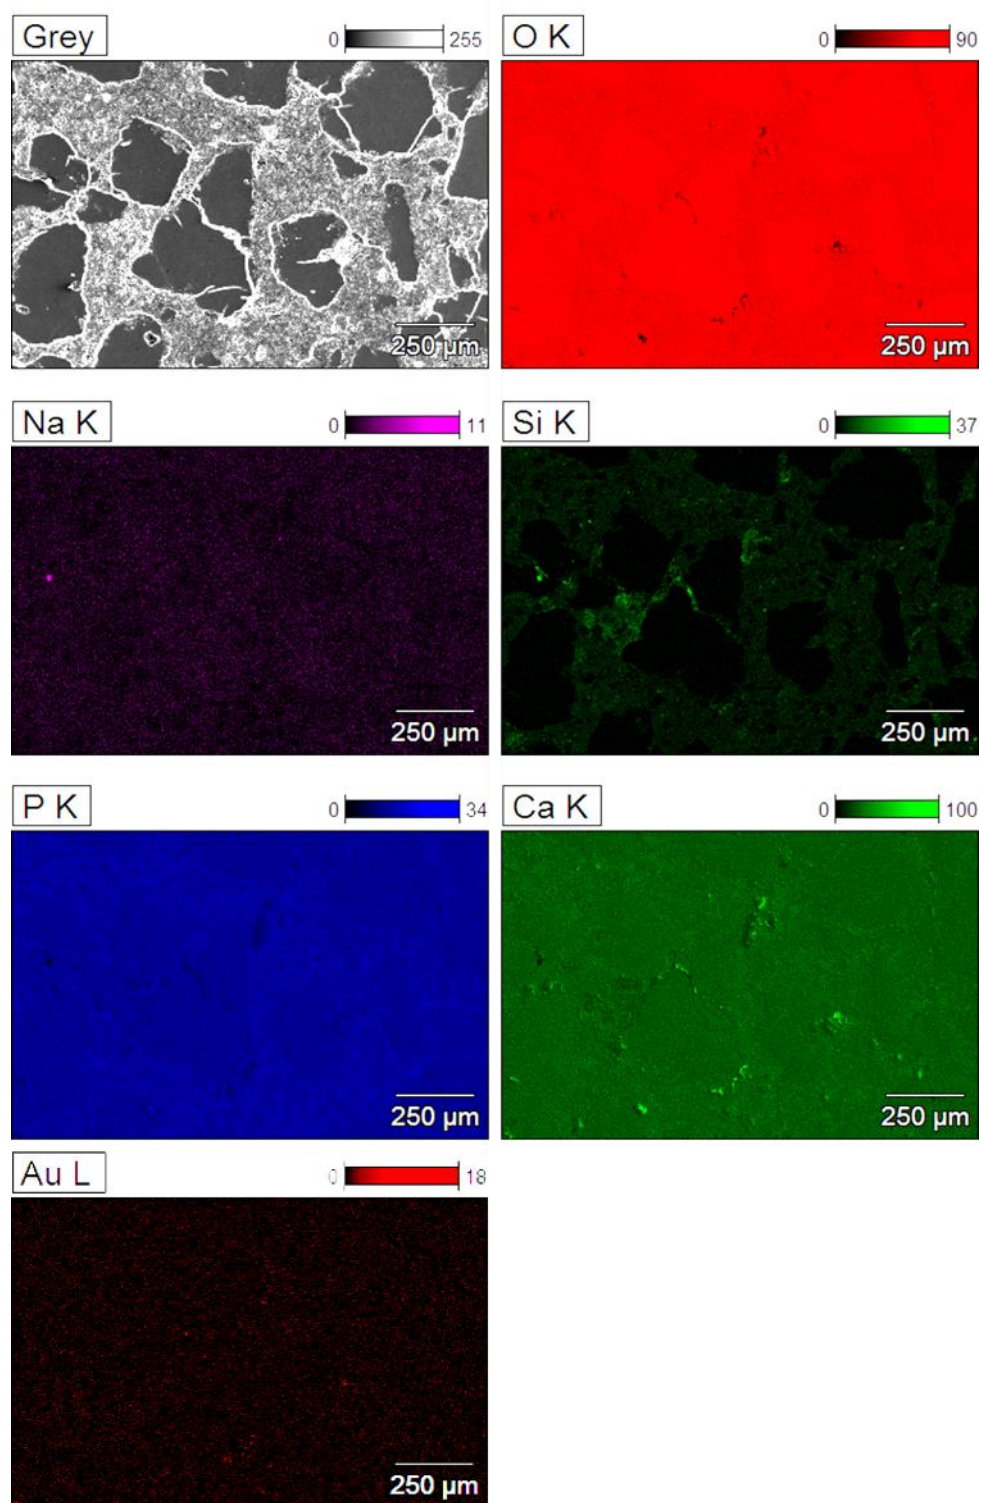

**Figure S1.** The scanning electron microscope (SEM) image and the elemental mapping of the surface of Au,Si-HT material.
